# Supplementary material for: The Protective Role of Microglial PPARα in Diabetic Retinal Neurodegeneration and Neurovascular Dysfunction
Source: MDPI journal article supplement (doi:10.3390/cells11233869), 2022-12-01
Supplement: s1 [file s1]

Supplemental Figure S1 Efficiency analysis of PPAR $\alpha$  siRNA knocking down in Human microglia cell HMC3.

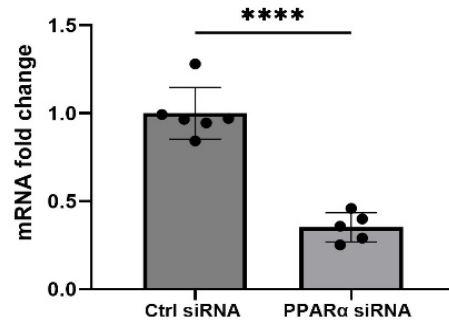

**Supplemental Figure S1. siRNA knockdown efficiency analysis.** HMC3 cells were transfected with *Ppara* siRNA or scramble siRNA. Forty-eight hours after transfection, cDNA was synthesized following RNA purification. Human *Ppara* was amplified using SYBR Green with the primers: 5'-GTTCAATGCACTGGAAGTGG-3' (Forward) and 5'-GACGATCTCCACAGCAAATG-3' (Reverse).  $\beta$ -actin was used as the housekeeping control. Human  $\beta$ -actin forward primer is 5'-GCCGGCTTCGCGGGCGACGA-3'. Human  $\beta$ -actin reverse primer is 5'-GCCACACGCAGCTCATTGTAGA-3'. n=5-6. Student's t-test. \*\*\*\*p<0.0001. Data are presented as mean $\pm$ SD.

Table S1 Antibodies

| Name                                                 | Vendor                            | Dilution  | Identifier                            |
|------------------------------------------------------|-----------------------------------|-----------|---------------------------------------|
| Rabbit Anti-Iba-1                                    | Wako                              | 1:100-300 | Cat#: 01919741,<br>RRID: AB_839504    |
| Rat Anti-CD11b                                       | Cell signaling                    | 1:100     | Cat#: 46512                           |
| Rabbit Anti-STING                                    | Proteintech                       | 1:100     | Cat#: 19851-1-AP<br>RRID: AB_10665370 |
| Rabbit Anti- TNF $\alpha$                            | Abcam                             | 1:1000    | Cat#: ab9739<br>RRID: AB_308774       |
| Rabbit Anti- TNF $\alpha$                            | Abcam                             | 1:50      | Cat#: ab1793<br>RRID:AB_302615        |
| Rabbit Anti- PPAR $\alpha$                           | Novus Biologicals                 | 1:1000    | RRID: AB_10001414                     |
| HRP conjugated<br>Goat Anti- $\beta$ actin           | Santa Cruz                        | 1:3000    | Cat# sc-47778HRP<br>RRID: AB_626632   |
| Alexa Fluor 488-<br>conjugated Donkey<br>Anti-rabbit | Jackson<br>ImmunoResearch<br>Labs | 1:500     | Cat#: 711-545-152,<br>RRID:AB_2313584 |
| Alexa Fluor 594-<br>conjugated Donkey<br>Anti-rabbit | Jackson<br>ImmunoResearch<br>Labs | 1:500     | Cat#: 711-585-152,<br>RRID:AB_2340621 |
| Alexa Fluor 594-<br>conjugated Donkey<br>Anti-rat    | Jackson<br>ImmunoResearch<br>Labs | 1:500     | Cat#: 712-585-153,<br>RRID:AB_2340689 |
| Peroxidase<br>conjugated Goat<br>Anti-rabbit         | Vector Laboratories               | 1:2000    | Cat#: PI-1000,<br>RRID:AB_2336198     |
| Peroxidase<br>conjugated Horse<br>Anti-mouse         | Vector Laboratories               | 1:2000    | Cat#: PI-2000,<br>RRID:AB_2336177     |
